# Supplementary material for: Exfoliation-free solvothermal synthesis of ink-like MoS2 gel for printable water purification filters
Source: Royal Society of Chemistry journal article supplement (doi:10.1039/d6ra01189f), 2026-05-27
Supplement: d6ra01189f1.pdf [file d6ra01189f1.pdf]

## Exfoliation-Free Solvothermal Synthesis of ink-like MoS<sub>2</sub> gel for Printable Water Purification Filters

Muralikrishna Sreeramareddygari<sup>a\*</sup>, Jyothi Mannekote Shivanna<sup>b\*</sup>, Zhoveta Yhobu<sup>c</sup>, S.  
Satyanarayana Reddy<sup>d</sup>, Mithran Somasundrum<sup>a,e</sup>, Chatuporn Phanthong<sup>a,e</sup>, Gurumurthy  
Hegde<sup>f,g,i</sup>, Patsamon Rijiravanich<sup>a,e</sup>, Werusak Surareungchai<sup>a,h</sup>

<sup>a</sup>*Sensor Technology Laboratory, Pilot Plant Development and Training Institute, King Mongkut's University of Technology Thonburi, Bangkhuntien-chaitalay Road, Thakam, Bangkok, 10150, Thailand*

<sup>b</sup>*Department of Chemistry, Nitte Meenakshi Institute of Technology (NMIT), Nitte (Deemed to be University), Bengaluru, India 560064*

<sup>c</sup>*Department of Chemical Sciences, Ariel University, Ariel 40 700, Israel*

<sup>d</sup>*Department of Physics, RV Institute of Technology and Management, Bengaluru, 560076, Karnataka, India*

<sup>e</sup>*Industrial Sensor Technology Research Team, National Center for Genetic Engineering and Biotechnology, National Science and Technology Development Agency at KMUTT (Bangkhuntien Campus), Bangkok, 10150, Thailand*

<sup>f</sup>*Dept of Chemistry, Christ University, Bangalore 560029*

<sup>g</sup>*Centre for Advanced Research and Development, Christ University, Bangalore 560029*

<sup>h</sup>*Faculty of Science, King Mongkut's University of Technology Thonburi, Pracha Uthit Rd, Thung Khru, Bangkok 10140, Thailand*

<sup>i</sup>*Center for Waste to Wealth Technology, Dayandanda Sagar University, Devarakaggalahalli, Harohalli, Kanakaoura Road, Bengaluru South Dt, 562112, India*

Corresponding Author's: [sreerama.mur@kmutt.ac.th](mailto:sreerama.mur@kmutt.ac.th) (Muralikrishna. S) and  
[jyothi0901@gmail.com](mailto:jyothi0901@gmail.com) (Jyothi. M.S)

Figure S1: Zeta potential of diluted MoS<sub>2</sub> ink using deionized water.

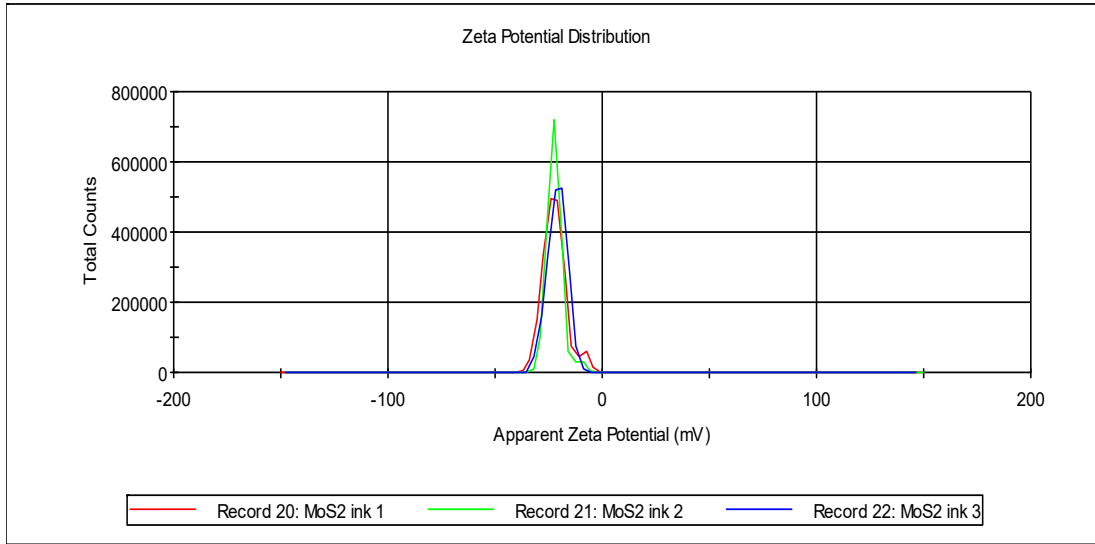

Figure S2: Zeta potential of 10 ppm Congo Red at pH 4

|                                     | Mean (mV)            | Area (%) | St Dev (mV) |
|-------------------------------------|----------------------|----------|-------------|
| <b>Zeta Potential (mV):</b> -40.8   | <b>Peak 1:</b> -40.8 | 100.0    | 6.36        |
| <b>Zeta Deviation (mV):</b> 6.36    | <b>Peak 2:</b> 0.00  | 0.0      | 0.00        |
| <b>Conductivity (mS/cm):</b> 0.0586 | <b>Peak 3:</b> 0.00  | 0.0      | 0.00        |

**Result quality : Good**

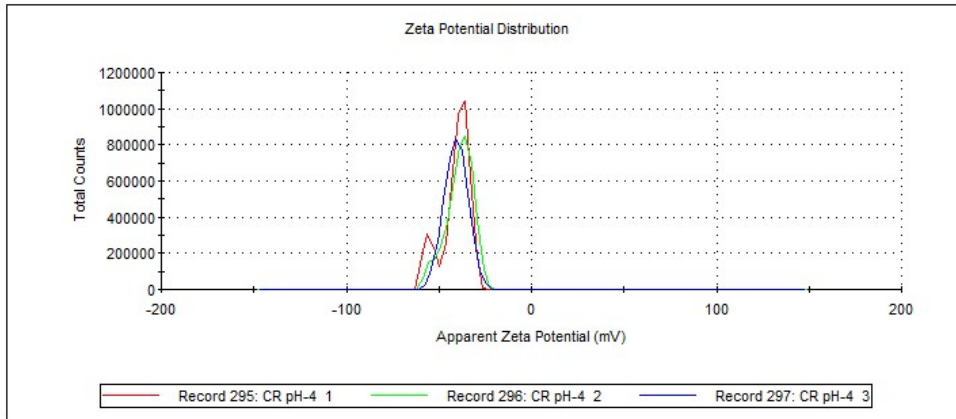

Figure S3: Zeta potential of 10 ppm Methylene Blue at pH 4

|                                     | Mean (mV)             | Area (%) | St Dev (mV) |
|-------------------------------------|-----------------------|----------|-------------|
| <b>Zeta Potential (mV):</b> 16.0    | <b>Peak 1:</b> 16.4   | 96.6     | 4.75        |
| <b>Zeta Deviation (mV):</b> 5.48    | <b>Peak 2:</b> -0.880 | 3.4      | 2.63        |
| <b>Conductivity (mS/cm):</b> 0.0650 | <b>Peak 3:</b> 0.00   | 0.0      | 0.00        |

Result quality : **Good**

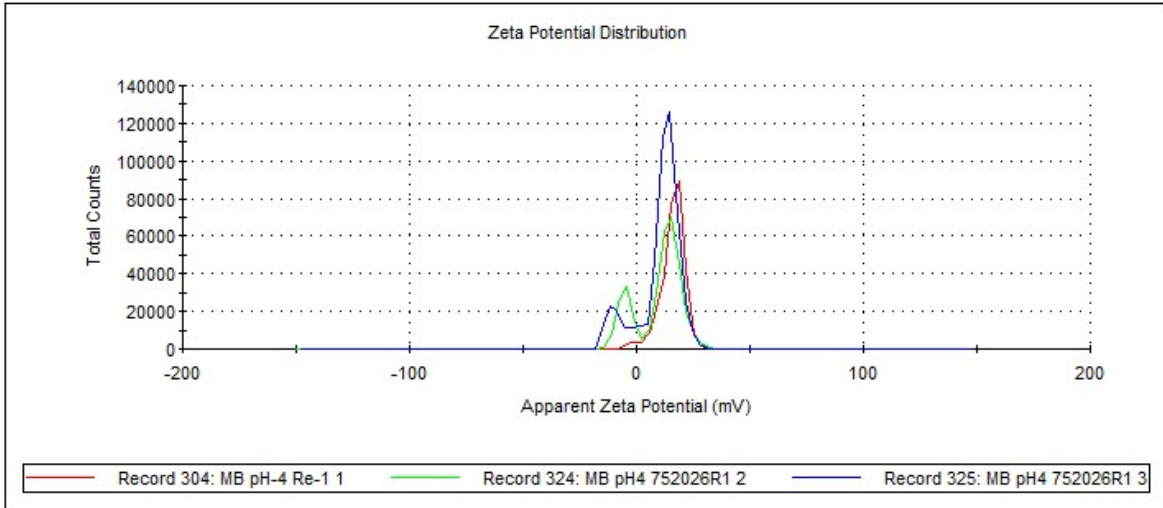

Figure S4: Zeta potential of 10 ppm Cr<sup>6+</sup> at pH 4

|                                     | Mean (mV)            | Area (%) | St Dev (mV) |
|-------------------------------------|----------------------|----------|-------------|
| <b>Zeta Potential (mV):</b> -12.9   | <b>Peak 1:</b> -10.7 | 87.6     | 4.31        |
| <b>Zeta Deviation (mV):</b> 7.78    | <b>Peak 2:</b> -29.3 | 11.2     | 4.39        |
| <b>Conductivity (mS/cm):</b> 0.0856 | <b>Peak 3:</b> -42.8 | 1.2      | 2.39        |

Result quality : **Good**

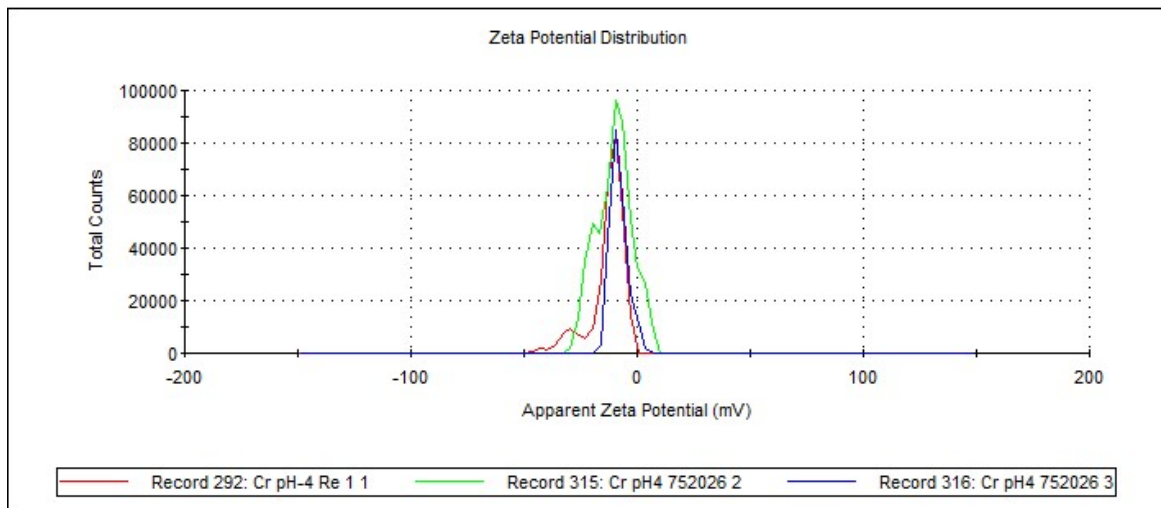

Figure S5: Zeta potential of 10 ppm Congo Red at pH 7

|                                   | Mean (mV)            | Area (%) | St Dev (mV) |
|-----------------------------------|----------------------|----------|-------------|
| <b>Zeta Potential (mV): -52.8</b> | <b>Peak 1: -52.8</b> | 100.0    | 5.80        |
| Zeta Deviation (mV): 5.80         | Peak 2: 0.00         | 0.0      | 0.00        |
| Conductivity (mS/cm): 0.0316      | Peak 3: 0.00         | 0.0      | 0.00        |

Result quality : **Good**

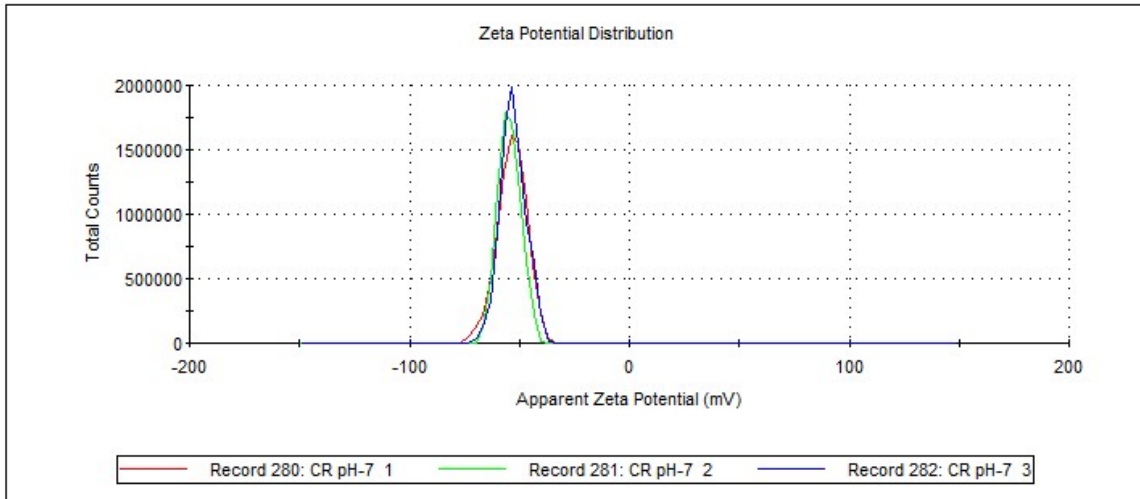

Figure S6: Zeta potential of 10 ppm Methylene Blue at pH 7

|                                   | Mean (mV)            | Area (%) | St Dev (mV) |
|-----------------------------------|----------------------|----------|-------------|
| <b>Zeta Potential (mV): -7.37</b> | <b>Peak 1: -7.37</b> | 100.0    | 5.74        |
| Zeta Deviation (mV): 5.74         | Peak 2: 0.00         | 0.0      | 0.00        |
| Conductivity (mS/cm): 0.00554     | Peak 3: 0.00         | 0.0      | 0.00        |

Result quality : **Good**

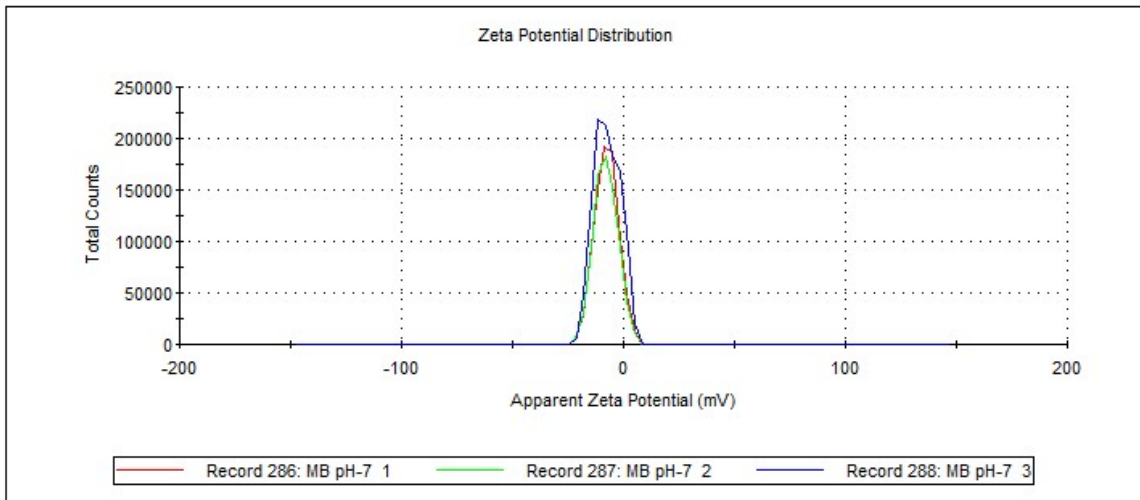

Figure S7: Zeta potential of 10 ppm Cr<sup>6+</sup> at pH 7

|                                     | Mean (mV)            | Area (%) | St Dev (mV) |
|-------------------------------------|----------------------|----------|-------------|
| <b>Zeta Potential (mV):</b> -17.0   | <b>Peak 1:</b> -36.2 | 76.6     | 10.3        |
| <b>Zeta Deviation (mV):</b> 85.5    | <b>Peak 2:</b> -86.8 | 3.5      | 6.94        |
| <b>Conductivity (mS/cm):</b> 0.0638 | <b>Peak 3:</b> 103   | 3.1      | 4.66        |

**Result quality :** See result quality report

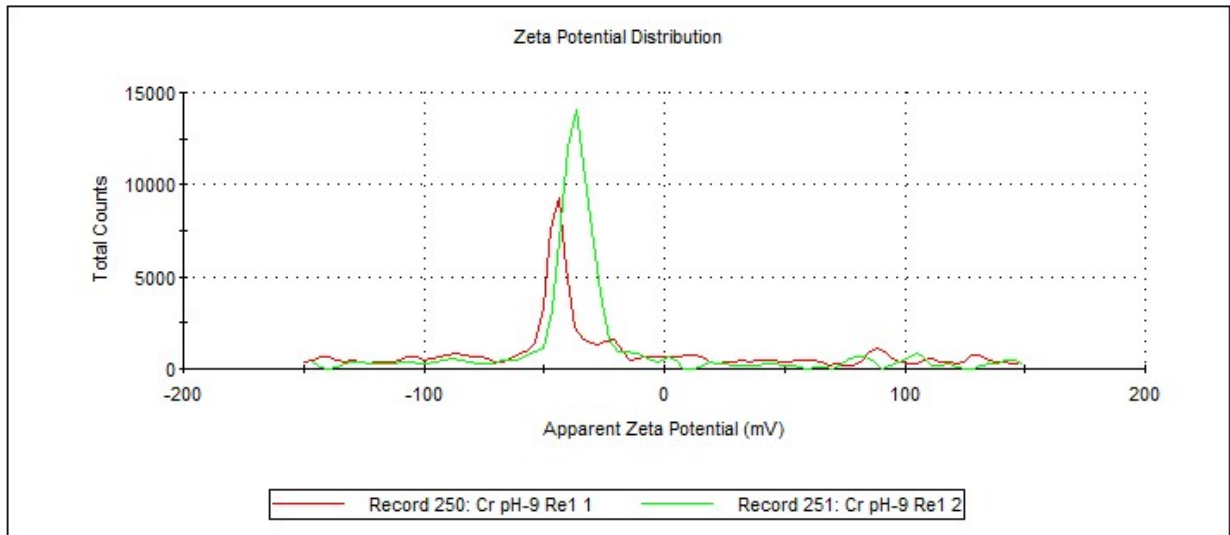

Figure S8: Zeta potential of 10 ppm Congo Red at pH 9

|                                     | Mean (mV)            | Area (%) | St Dev (mV) |
|-------------------------------------|----------------------|----------|-------------|
| <b>Zeta Potential (mV):</b> -65.5   | <b>Peak 1:</b> -65.5 | 100.0    | 7.40        |
| <b>Zeta Deviation (mV):</b> 7.40    | <b>Peak 2:</b> 0.00  | 0.0      | 0.00        |
| <b>Conductivity (mS/cm):</b> 0.0348 | <b>Peak 3:</b> 0.00  | 0.0      | 0.00        |

**Result quality :** Good

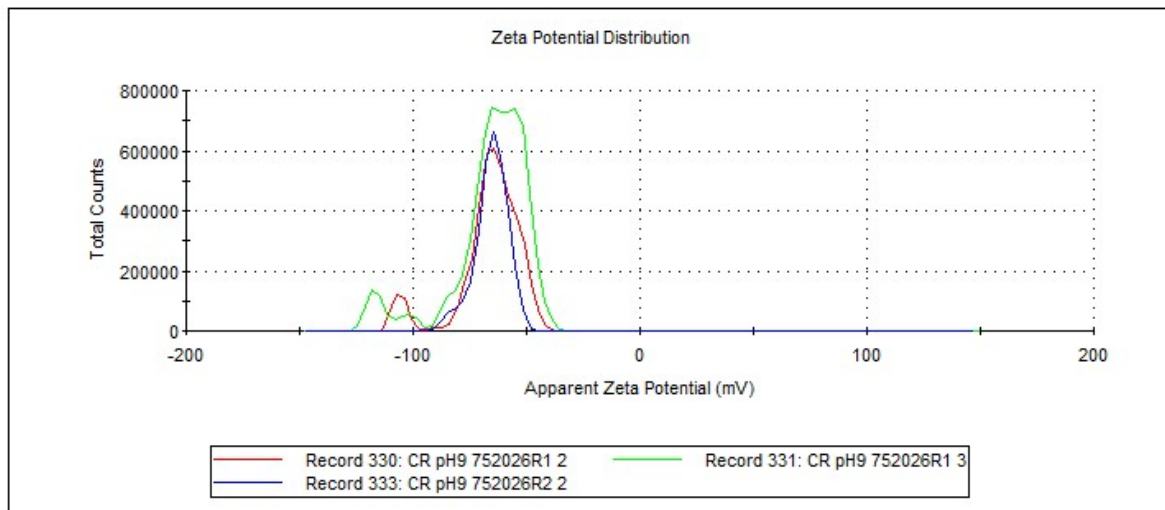

Figure S9: Zeta potential of 10 ppm Methylene Blue at pH 9

|                              | Mean (mV)     | Area (%) | St Dev (mV) |
|------------------------------|---------------|----------|-------------|
| Zeta Potential (mV): -9.41   | Peak 1: -9.41 | 100.0    | 6.09        |
| Zeta Deviation (mV): 6.09    | Peak 2: 0.00  | 0.0      | 0.00        |
| Conductivity (mS/cm): 0.0412 | Peak 3: 0.00  | 0.0      | 0.00        |

Result quality : **Good**

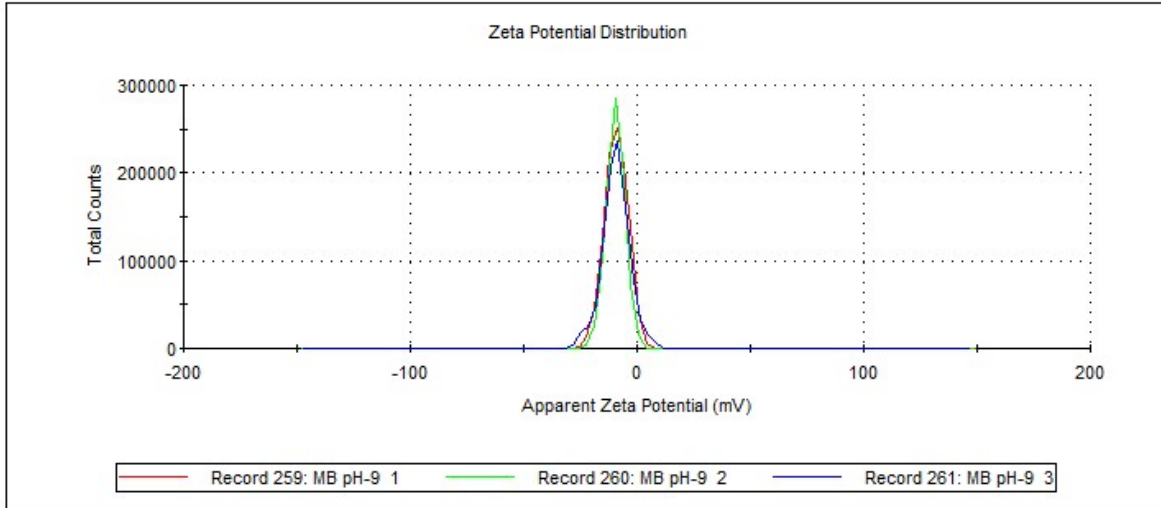

Figure S10: Zeta potential of 10 ppm Cr<sup>6+</sup> at pH 9

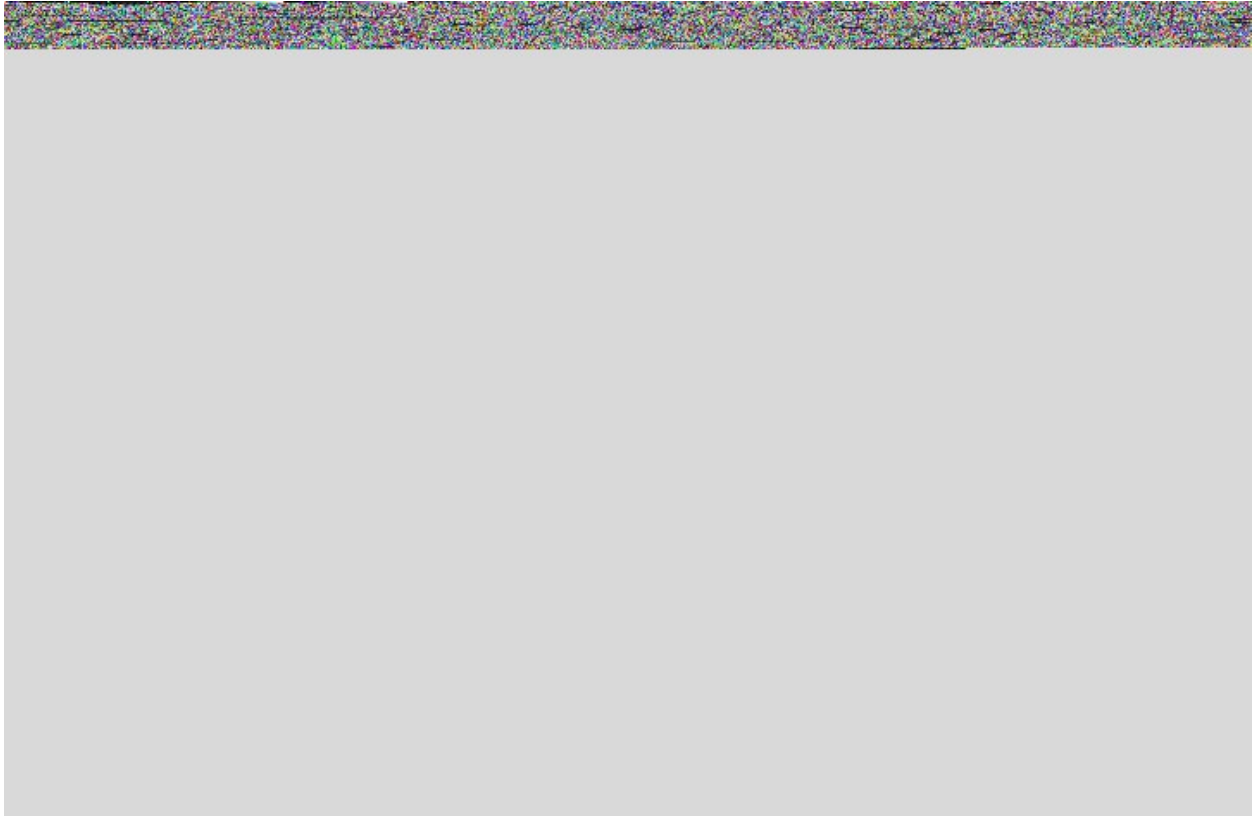

Table S1: Zeta potential values for the contaminants at varied pH

| Contaminant | Zeta Potential in mV |       |       |
|-------------|----------------------|-------|-------|
|             | pH 4                 | pH 7  | pH 9  |
| CR          | -40.8                | -52.8 | -65.5 |
| MB          | +16.0                | -7.37 | -9.41 |
| Cr          | -12.9                | -2.66 | -17.0 |
